# Supplementary material for: A novel dodecanuclear cadmium(ii) macrocycle with a 3D framework: synthesis, structure and properties
Source: Royal Society of Chemistry journal article supplement (doi:10.1039/c2ce06694g), 2012-01-01
Supplement: c2ce06694g.pdf [file c2ce06694g.pdf]

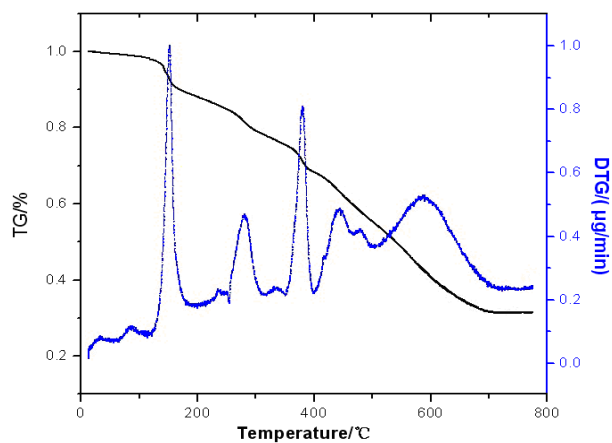

Figure S1. The plots of thermogravimetric (TG) and derivative thermogravimetry (DTG) analyses of **1**.

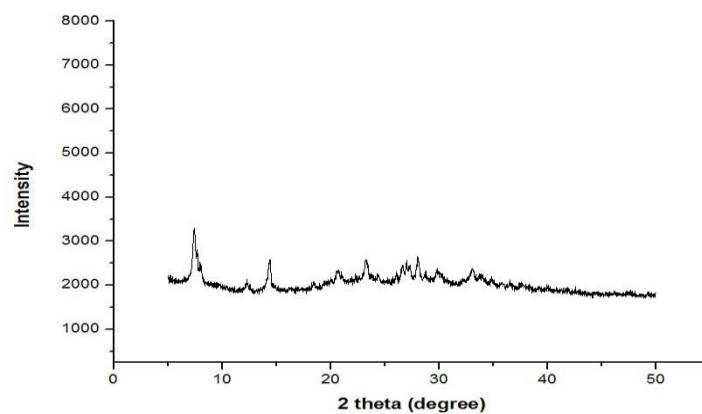

Figure S2. PXRD patterns of **1** after heated at 160 °C.

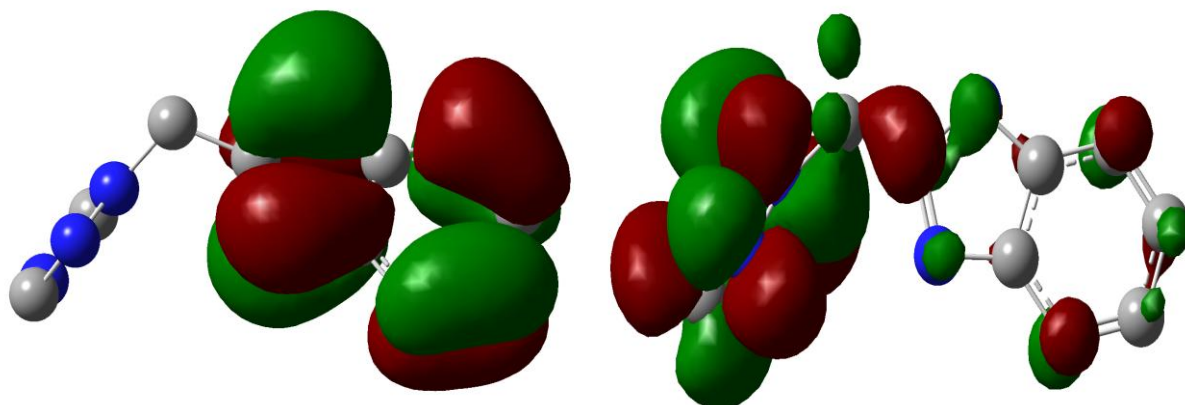

Figure S3. Htmb: (left) HOMO (-0.88 eV); (right) LUMO (3.81 eV)

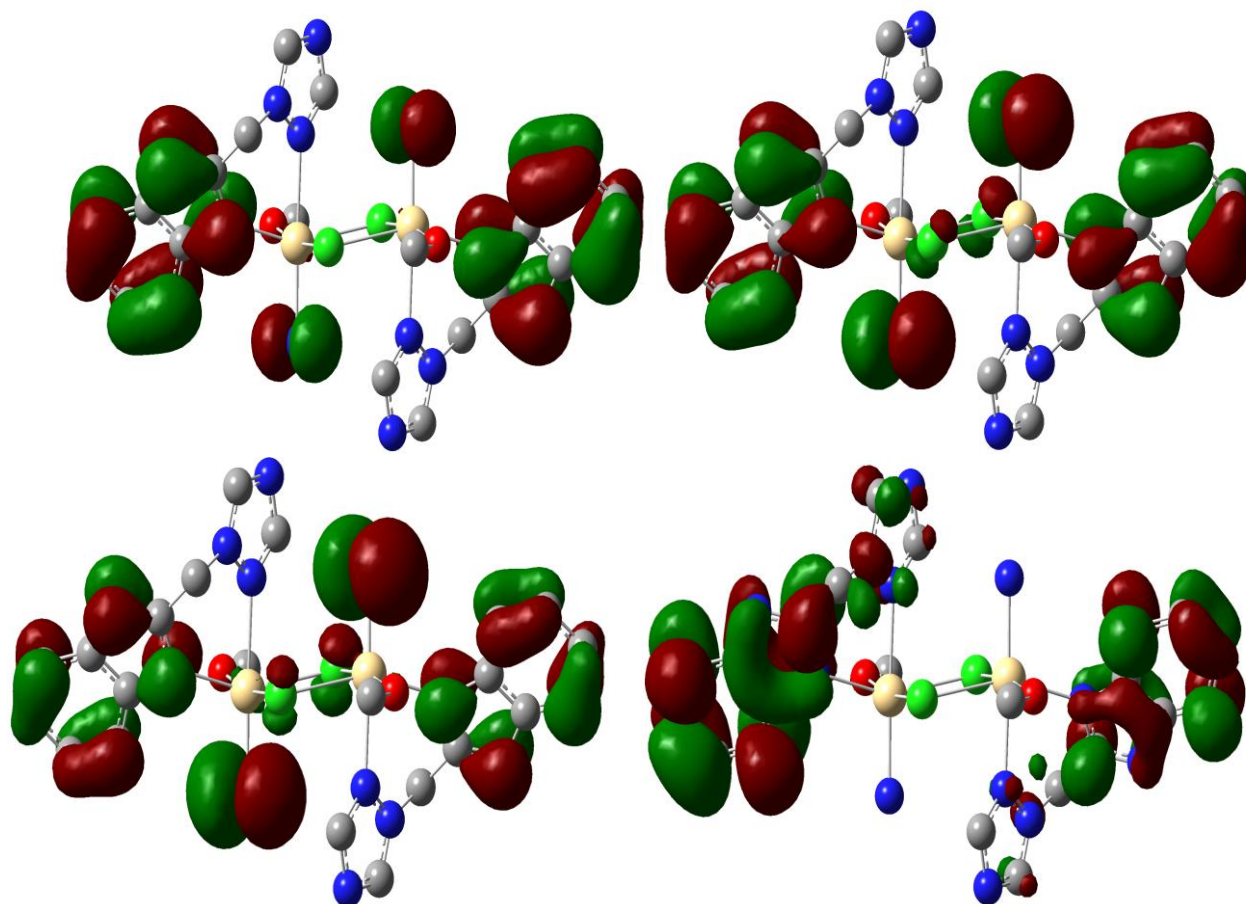

Figure S4. The binuclear unit  $[\text{Cd}_2(\text{tmb})_2(\text{Cl})_2(\text{CH}_3\text{OH})_2]$ : (left upper) HOMO (-5.67 eV); (right upper) HOMO-1(-5.81 eV); (lower left) LUMO (-0.53 eV); (lower right) LUMO+1(-0.37 eV).

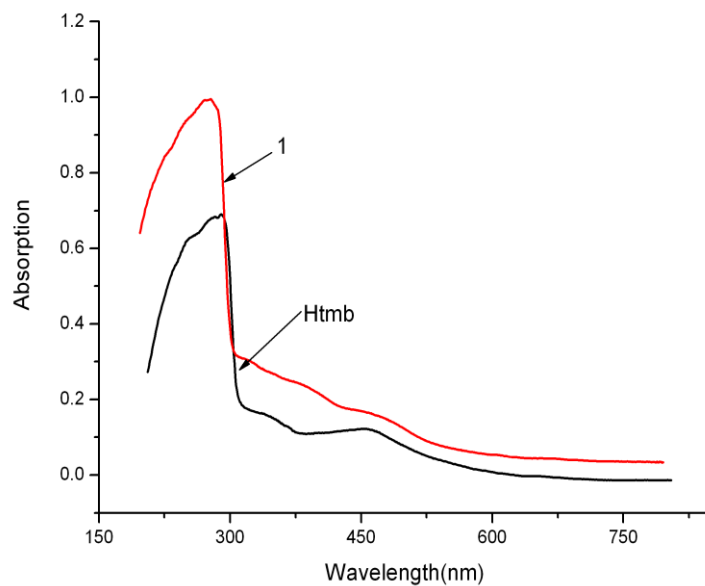

Figure S5. The solid state UV-Vis spectra of the ligand Htmb and **1**

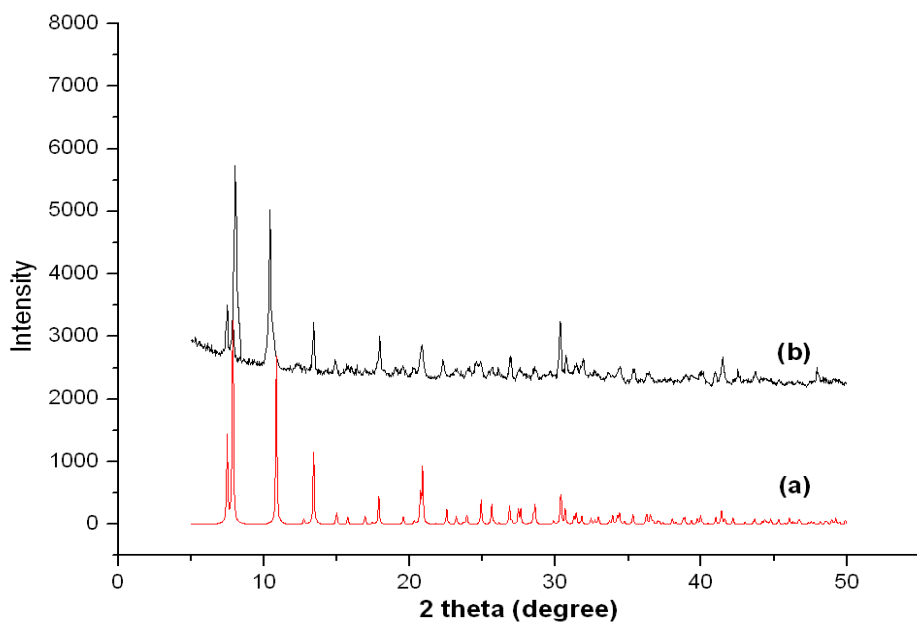

Figure S6. PXRD patterns of **1** simulated from X-ray single-crystal data (a), and experiment data (b).
